# Supplementary material
Source: PubMed Central journal article supplement (PMC9844517)
Supplement: NIHMS1860415-supplement-Supp_File_1.pdf [file NIHMS1860415-supplement-Supp_File_1.pdf]

Supplementary Materials for  
**Adenoviral-based vaccine promotes neoantigen-specific CD8<sup>+</sup> T cell stemness  
and tumor rejection**

Anna Morena D'Alise *et al.*

Corresponding author: Luigia Pace, [luigia.pace@iigm.it](mailto:luigia.pace@iigm.it); Elisa Scarselli, [e.scarselli@nouscom.com](mailto:e.scarselli@nouscom.com)

*Sci. Transl. Med.* **14**, eabo7604 (2022)  
DOI: 10.1126/scitranslmed.abo7604

**The PDF file includes:**

Figs. S1 to S6  
Tables S1  
Legend for table S2

**Other Supplementary Material for this manuscript includes the following:**

MDAR Reproducibility Checklist  
Data file S1

## Supplementary figures

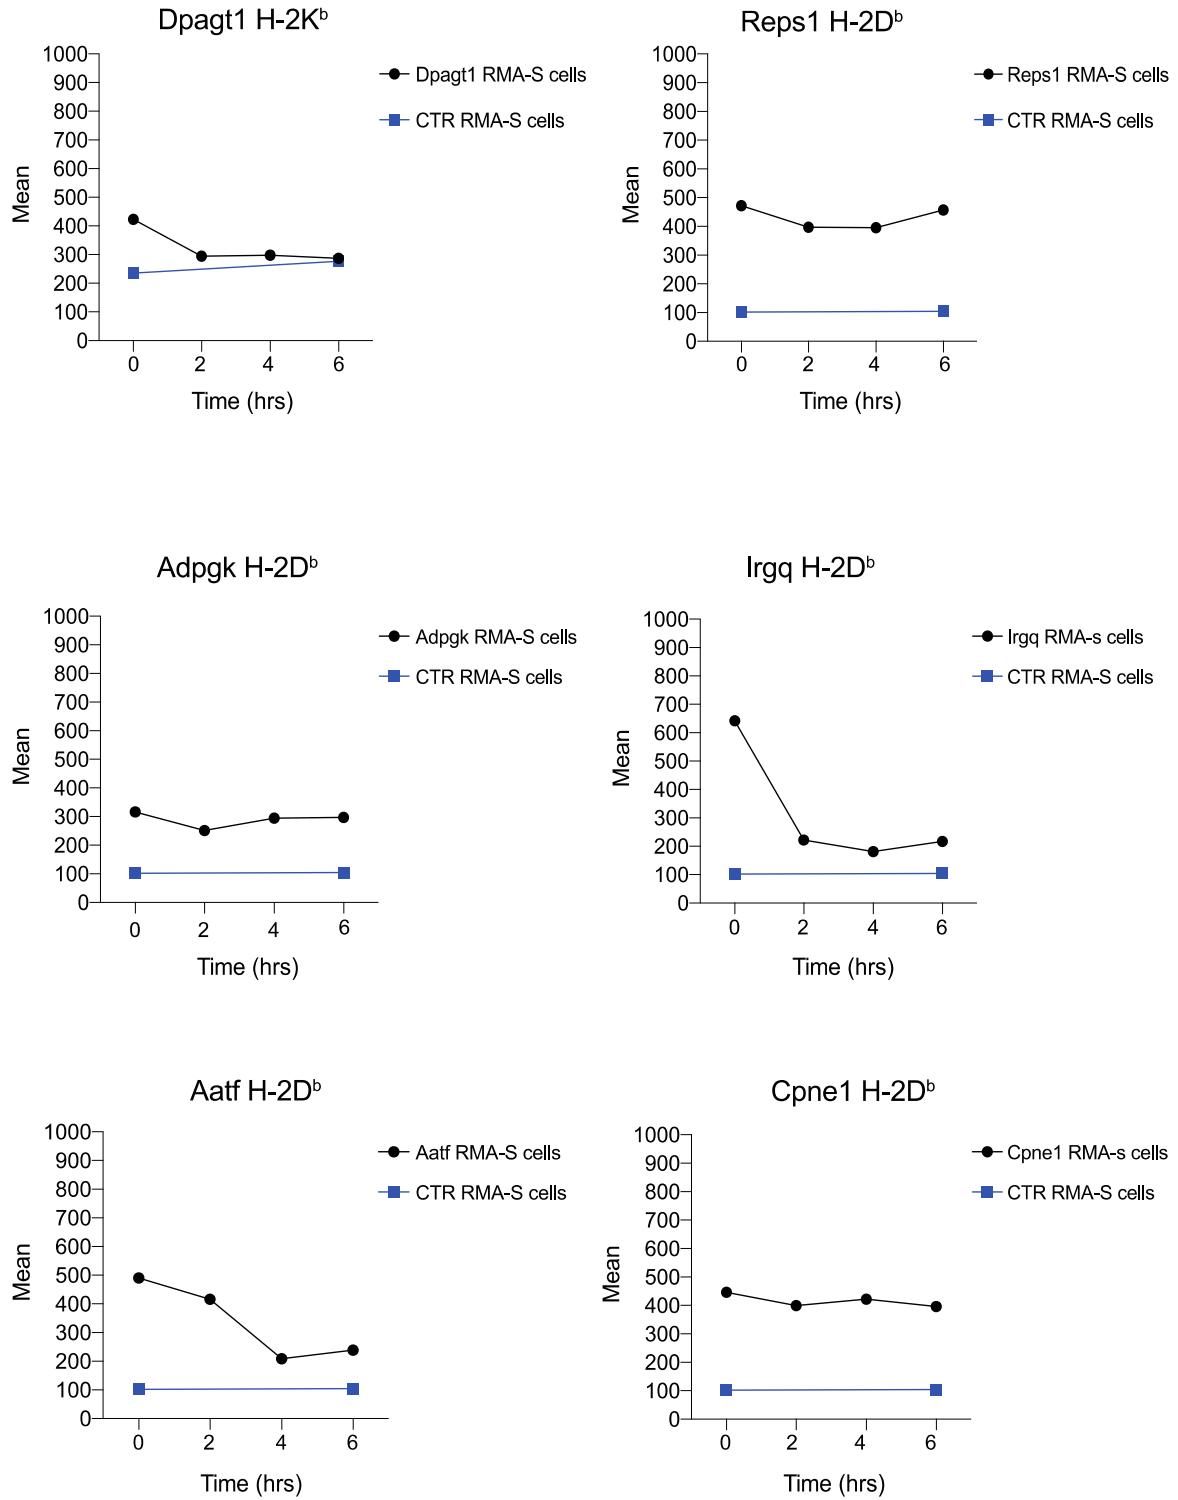

**Fig. S1. Kinetics of MHC-I (major histocompatibility complex I)-peptide affinity and stability were evaluated over time.** Dpagt1, Reps1, Adpgk, Irgq, Aatf and Cpne1 were analyzed. Mean of two independent experiments is shown.

# Adpgk

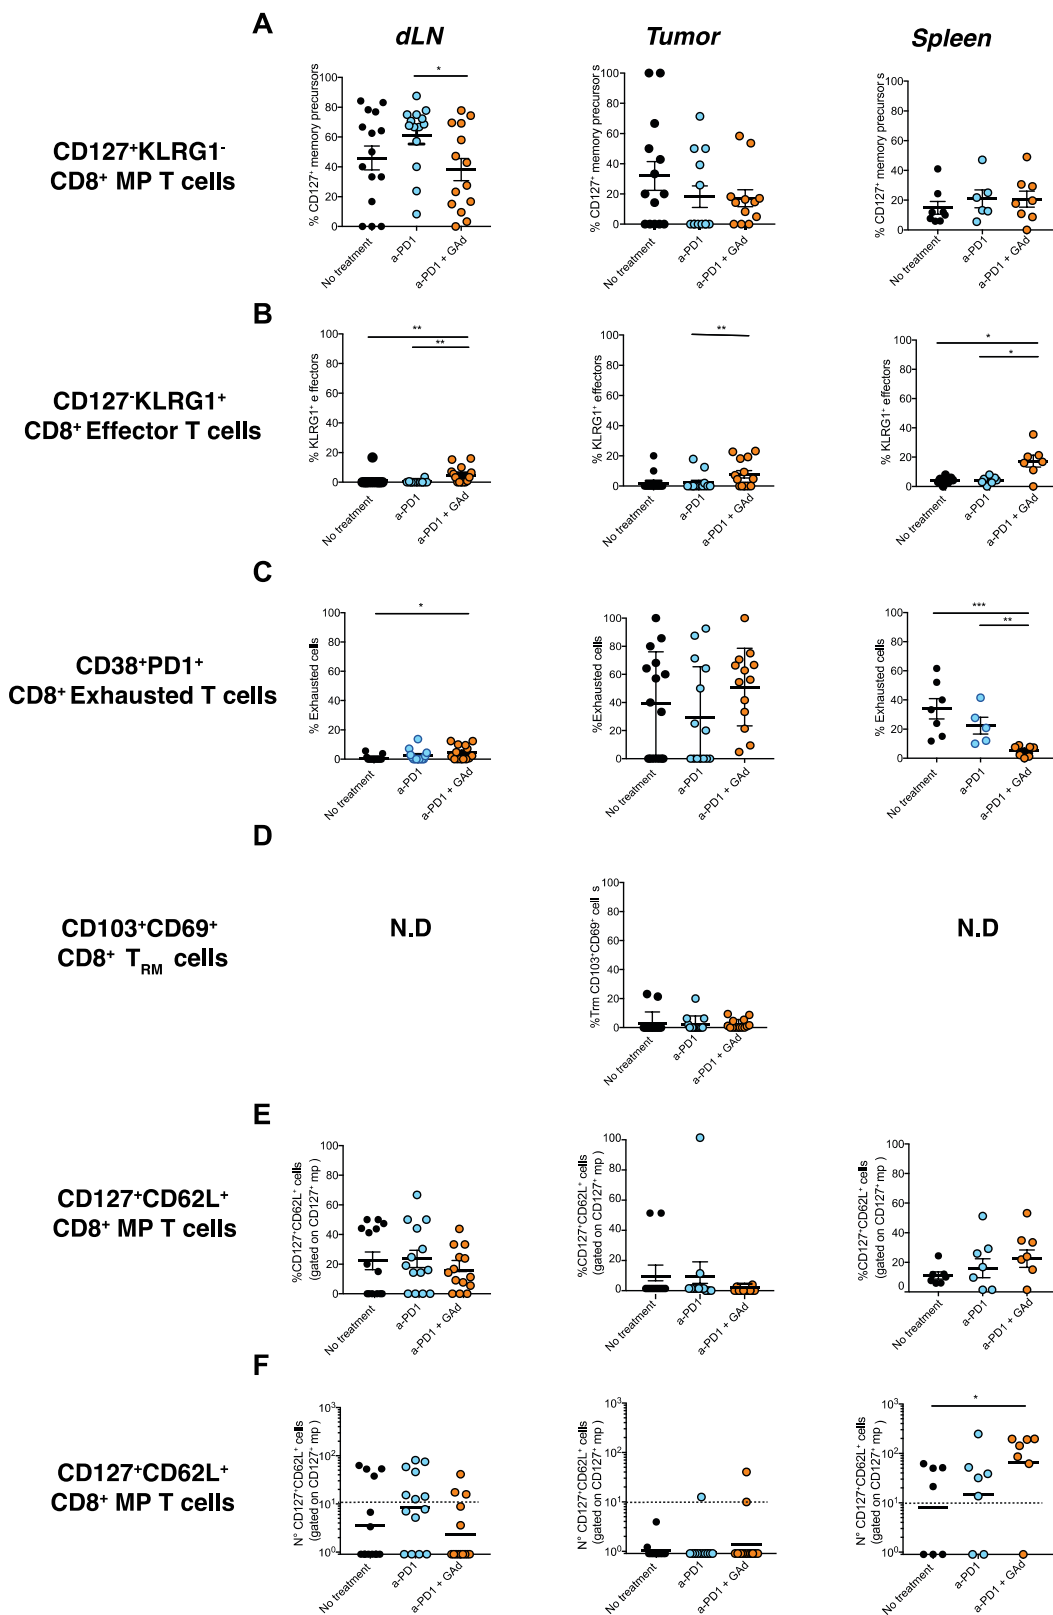

**Fig. S2. Analysis of neopeptide specific D<sup>b</sup>-Adpgk<sup>+</sup> CD8<sup>+</sup> T cell differentiation following GAd combined with  $\alpha$ PD-1 treatment in tumor-bearing mice.**

(A-E) Percentages of memory precursor (A), effector (B), exhausted (C), T<sub>RM</sub> (D) (not determined = N.D) in draining lymph nodes and spleens, CD127<sup>+</sup>CD62L<sup>+</sup> memory precursors cells (E) gated on D<sup>b</sup>-Adpgk<sup>+</sup> CD8<sup>+</sup> T cells were measured in draining lymph nodes, tumors and spleens of tumor-bearing mice. (F) Numbers of CD127<sup>+</sup>CD62L<sup>+</sup> memory precursors on gated D<sup>b</sup>-Adpgk<sup>+</sup> CD8<sup>+</sup> T cells were measured in draining lymph nodes, tumors and spleens of tumor-bearing mice. Data are shown as mean with SEM in (A-E) and as geometric mean in (F). \* =  $P < 0.05$ , \*\* =  $P < 0.01$ , \*\*\* =  $P < 0.001$  (Mann-Whitney test). Graphs are representative of six experiments with seven mice per group.

dLN

A

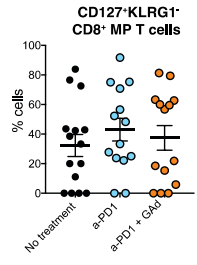

Reps1

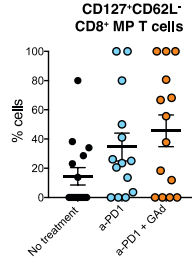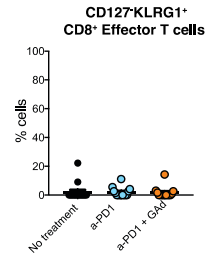

B

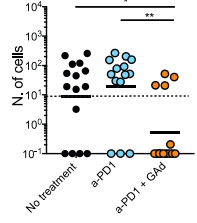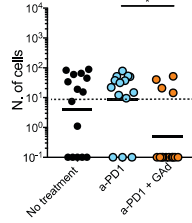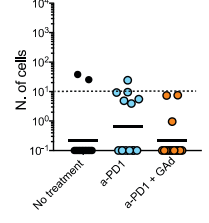

Tumor

C

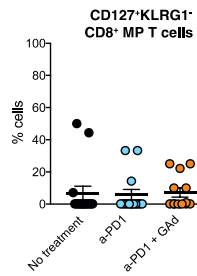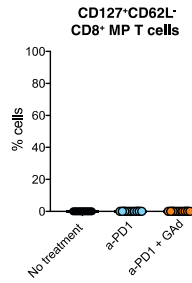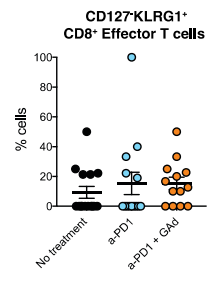

D

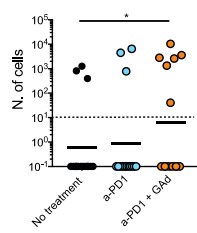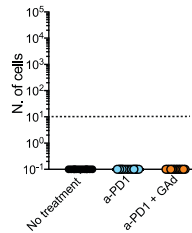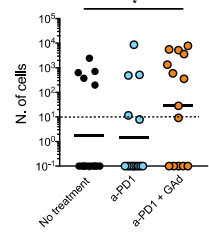

Spleen

E

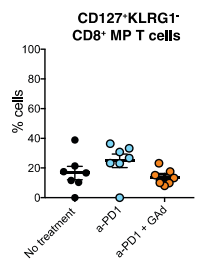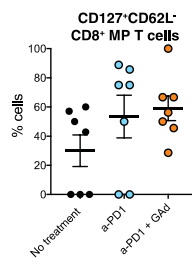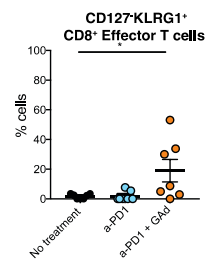

F

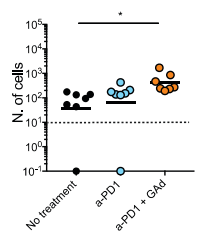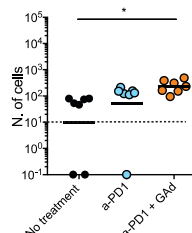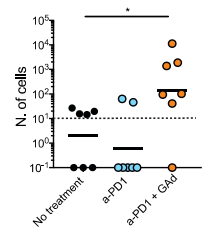

**Fig. S3. Analysis of neopeptide specific D<sup>b</sup>-Reps1<sup>+</sup> CD8<sup>+</sup> T cell differentiation following GAd combined with αPD-1 treatment in tumor-bearing mice.**

Percentages (A) and numbers (N.) (B) of CD127<sup>+</sup> memory precursor, CD127<sup>+</sup>CD62L<sup>+</sup> central memory precursor, and KLRG1<sup>+</sup> effector cells gated on D<sup>b</sup>-Reps1<sup>+</sup> CD8<sup>+</sup> T cells were measured in draining lymph node of tumor-bearing mice. Percentages (C) and numbers (D) of CD127<sup>+</sup> memory precursor, CD127<sup>+</sup>CD62L<sup>+</sup> central memory precursor, and KLRG1<sup>+</sup> effector cells gated on D<sup>b</sup>-Reps1<sup>+</sup> CD8<sup>+</sup> T cells were measured in tumors. Percentages (E) and numbers (F) of CD127<sup>+</sup> memory precursors, CD127<sup>+</sup>CD62L<sup>+</sup> central memory precursors, and KLRG1<sup>+</sup> effectors on gated D<sup>b</sup>-Reps1<sup>+</sup> CD8<sup>+</sup> T cells were measured in spleen of tumor-bearing mice. Percentages are shown as mean with SEM and cell numbers are shown as geometric mean. \* =  $P < 0.05$ , \*\* =  $P < 0.01$ , \*\*\* =  $P < 0.001$  (Mann-Whitney test). Not detected (N.D.). Graphs are representative of six experiments with seven mice per group.

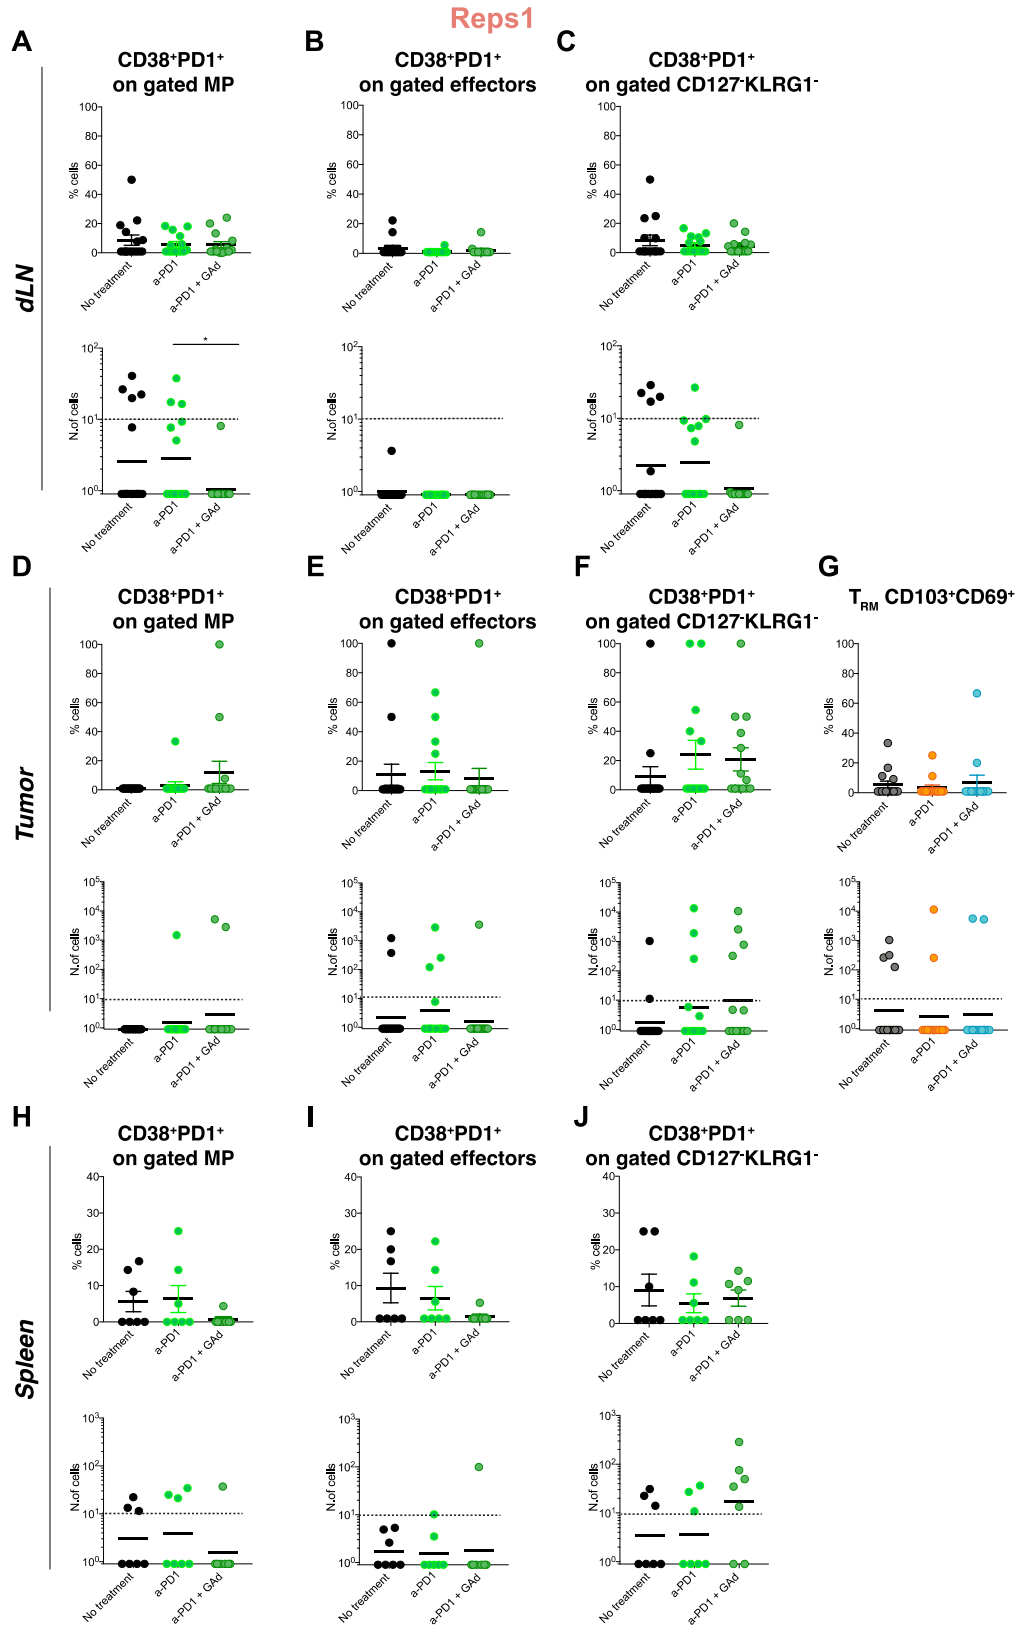



**Fig. S4. Analysis of neopeptide specific D<sup>b</sup>-Reps1<sup>+</sup> CD8<sup>+</sup> T cell differentiation following GAd combined with  $\alpha$ PD-1 treatment in tumor-bearing mice.**

(**A-C**) Percentages (top row) and numbers (N.) (bottom row) of CD38<sup>+</sup>PD1<sup>+</sup> cells gated on memory precursor (**A**), on effector (**B**) and on CD127<sup>-</sup>KLRG1<sup>-</sup> (**C**) D<sup>b</sup>-Reps1<sup>+</sup> CD8<sup>+</sup> T cells were measured in draining lymph node. (**D-F**) Percentages (top row) and numbers (bottom row) of CD38<sup>+</sup>PD1<sup>+</sup> cells gated on memory precursor (**D**), on effector (**E**) and on CD127<sup>-</sup>KLRG1<sup>-</sup> (**F**) D<sup>b</sup>-Reps1<sup>+</sup> CD8<sup>+</sup> T cells were measured in tumors. (**G**) Percentages (top row) and numbers (bottom row) of CD103<sup>+</sup>CD69<sup>+</sup> D<sup>b</sup>-Reps1<sup>+</sup> CD8<sup>+</sup> T<sub>RM</sub> T cells were measured in tumors. (**H-J**) Percentages (top row) and numbers (bottom row) of CD38<sup>+</sup>PD1<sup>+</sup> cells gated on memory precursor (**H**), on effector (**I**) and on CD127<sup>-</sup>KLRG1<sup>-</sup> (**J**) D<sup>b</sup>-Reps1<sup>+</sup> CD8<sup>+</sup> T cells were measured in spleen. Percentages are shown as mean with SEM and cell numbers are shown as geometric mean. \*=  $P < 0.05$ , \*\* =  $P < 0.01$ , \*\*\* =  $P < 0.001$  (Mann-Whitney test). Graphs are representative of six experiments with seven mice per group.

D'Alise et al., Supplementary Figure S5

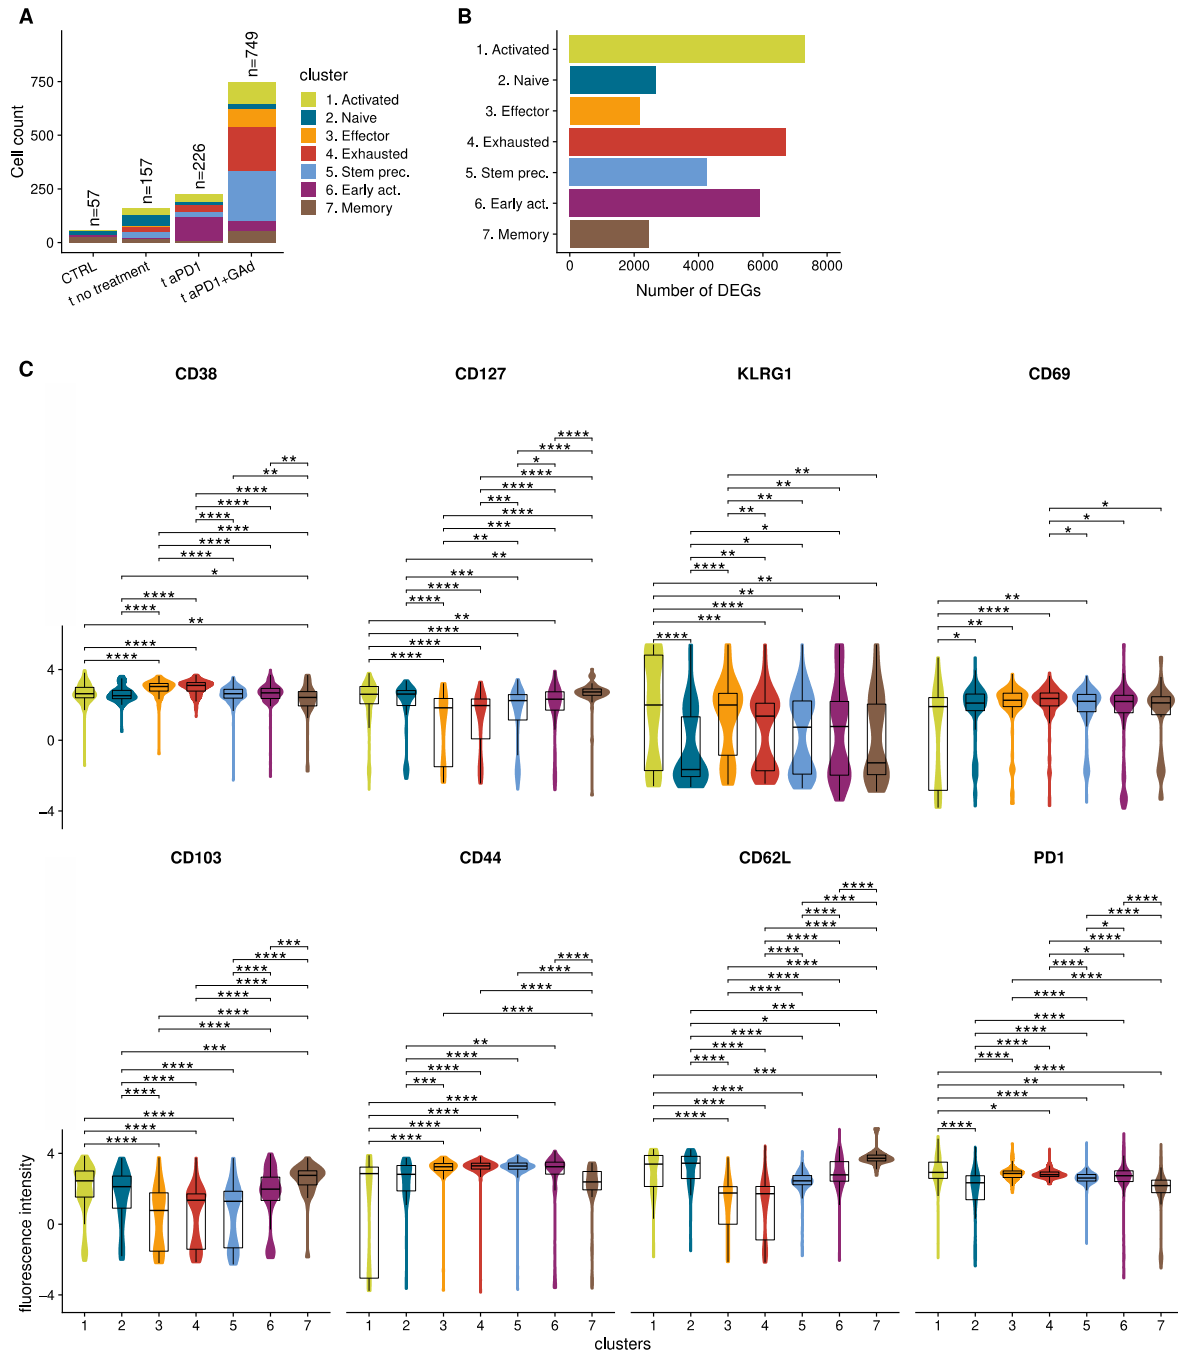

**Fig. S5. scRNA-seq analysis of Adpgk specific CD8<sup>+</sup> T cells from treated mice. (A)** Distribution of D<sup>b</sup>-Adpgk<sup>+</sup> CD8<sup>+</sup> T cells in each experimental condition (CTRL= mice without tumor and without treatment, T no treatment = untreated tumor-bearing mice, T αPD1= tumor-bearing mice treated with αPD1 and T αPD1+GAd= tumor-bearing mice treated with αPD1+ GAd vaccine) color coded by cluster. **(B)** Differentially expressed genes for each cluster. **(C)** The geometric Mean Fluorescence Intensity (gMFI) values obtained from FACS sorting were projected onto cluster data, shown as log<sub>10</sub>(x) and -log<sub>10</sub>(x) of raw positive and negative values, respectively.

D'Alise et al., Supplementary Figure S6

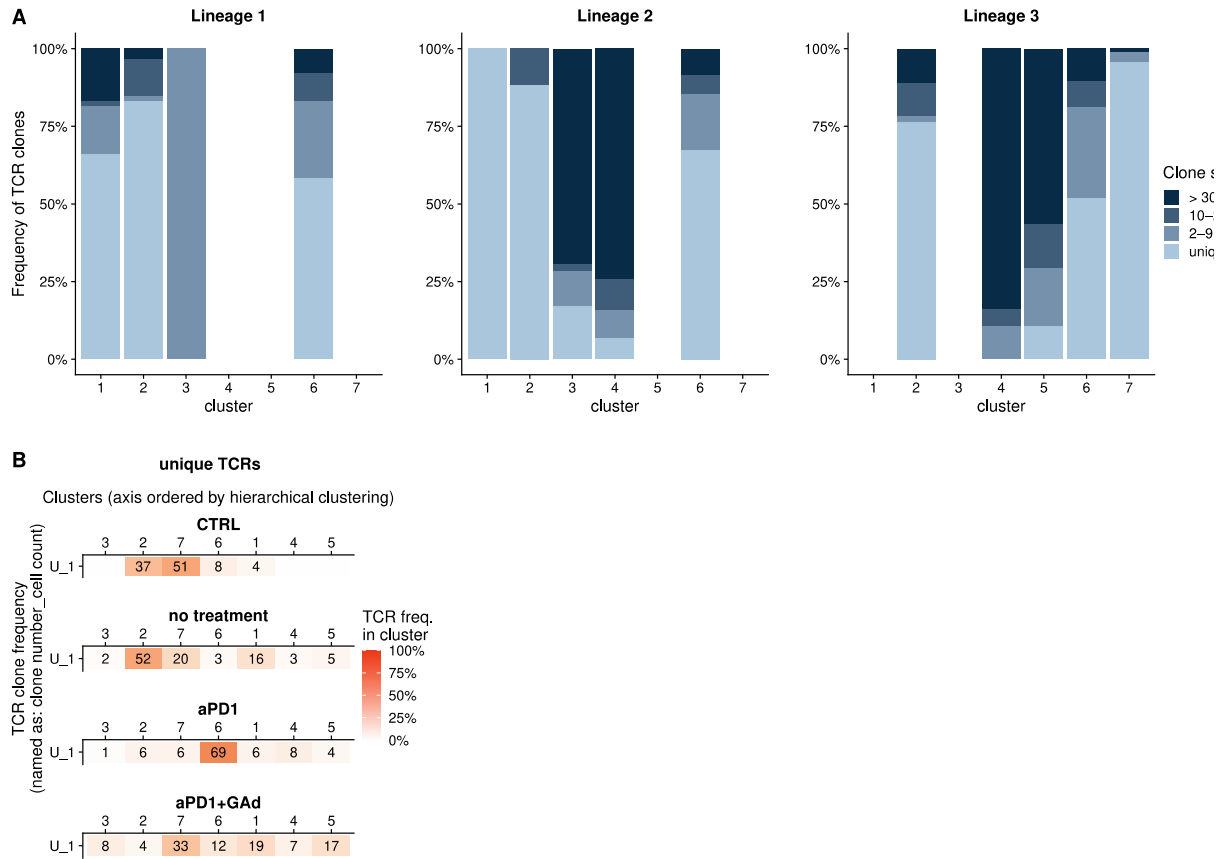

**Fig. S6. scTCR analysis of Adpgk specific CD8<sup>+</sup> T cells. (A)** Distribution of TCR clonotypes in the different lineages. **(B)** Frequencies of unique clonotypes across clusters.

**Table S1: Baseline demographics and disease characteristics.**

|                                                 | <b>Dose 1 (N=3)</b> | <b>Dose 2 (N=9)</b> | <b>Total (N=12)</b> |
|-------------------------------------------------|---------------------|---------------------|---------------------|
| Male, N (%)                                     | 3 (100)             | 5 (56)              | 8 (67)              |
| Age mean (range)                                | 53.7 (31-74)        | 57.7 (27-79)        | 56.7 (27-79)        |
| <b>ECOG PS, N (%)</b>                           |                     |                     |                     |
| 0                                               | 2 (67)              | 3 (33)              | 5 (42)              |
| 1                                               | 1 (33)              | 6 (67)              | 7 (58)              |
| <b>Cancer Type, N (%)</b>                       |                     |                     |                     |
| Colorectal                                      | 2 (67)              | 6 (67)              | 8 (67)              |
| Gastric                                         | 0 (0)               | 3 (33)              | 3 (25)              |
| Gastro-esophageal junction                      | 1 (33)              | 0 (0)               | 1 (8)               |
| <b>Line of therapy, N (%)</b>                   |                     |                     |                     |
| 1L                                              | 0 (0)               | 6 (67)              | 6 (50)              |
| 2L                                              | 3 (100)             | 3 (33)              | 6 (50)              |
| <b>Metastases</b>                               |                     |                     |                     |
| Liver                                           | 2 (67)              | 2 (22)              | 4 (33)              |
| Peritoneal                                      | 0 (0)               | 6 (67)              | 6 (50)              |
| <b>Genetic alterations</b>                      |                     |                     |                     |
| Lynch syndrome carrier, N (%)                   | 0 (0)               | 2 (22)              | 2 (17)              |
| <b>Tumor burden</b>                             |                     |                     |                     |
| Target lesion sum at baseline, mm, mean (range) | 67.3 (44-111)       | 65.4 (26-108)       | 65.9 (26-111)       |

**Table S2: List of FSPs detected in patient 1 (Excel file)**
